# Supplementary material for: Towards the implementation of malaria elimination policy in South Africa: the stakeholders’ perspectives
Source: PubMed Central journal article supplement (PMC5496171; doi:10.1080/16549716.2017.1288954), 2017-05-05
Supplement: ZGHA_A_1288954_SM6453.pdf [file ZGHA_A_1288954_SM6453.pdf]

# Title: Factors influencing the implementation of the malaria elimination policy in South Africa

## Interview Questions Asked of Key Informants

| Category of Questions                                                      | Key Informant Category                                                                                                                                                                                                                                                                                                                                                                                                                                                                       |                                                                                                                                                                                                                                                                                                                                                                                                                                                           |                                                                                                                                                                                                                                                                                                                                                                                                                                                                                                                                      |
|----------------------------------------------------------------------------|----------------------------------------------------------------------------------------------------------------------------------------------------------------------------------------------------------------------------------------------------------------------------------------------------------------------------------------------------------------------------------------------------------------------------------------------------------------------------------------------|-----------------------------------------------------------------------------------------------------------------------------------------------------------------------------------------------------------------------------------------------------------------------------------------------------------------------------------------------------------------------------------------------------------------------------------------------------------|--------------------------------------------------------------------------------------------------------------------------------------------------------------------------------------------------------------------------------------------------------------------------------------------------------------------------------------------------------------------------------------------------------------------------------------------------------------------------------------------------------------------------------------|
|                                                                            | Researchers                                                                                                                                                                                                                                                                                                                                                                                                                                                                                  | Malaria Personnel                                                                                                                                                                                                                                                                                                                                                                                                                                         | Policy Makers                                                                                                                                                                                                                                                                                                                                                                                                                                                                                                                        |
| <b>Interviewee details</b>                                                 | <ol style="list-style-type: none"> <li>1. Age in last birthday</li> <li>2. Sex</li> <li>3. Nationality</li> <li>4. Employing organisation</li> <li>5. Country of work/ employment</li> <li>6. Current job designation/ title</li> <li>7. Highest qualification</li> <li>8. Years of experience in current job</li> </ol>                                                                                                                                                                     | <ol style="list-style-type: none"> <li>1. Age in last birthday</li> <li>2. Sex</li> <li>3. Home province (nationality if not South African)</li> <li>4. Work province</li> <li>5. Current job designation/ title</li> <li>6. Highest qualification</li> <li>7. Years of experience in current job</li> </ol>                                                                                                                                              | <ol style="list-style-type: none"> <li>1. Age in last birthday</li> <li>2. Sex</li> <li>3. Current job designation/ title</li> <li>4. Highest qualification</li> <li>5. Years of experience in current job</li> </ol>                                                                                                                                                                                                                                                                                                                |
| <b>Knowledge, attitudes and perceptions concerning malaria elimination</b> | <ol style="list-style-type: none"> <li>9. From research point of view, to what extent is malaria elimination agenda a priority for you? Elaborate</li> <li>10. Are you concerned about the level of malaria prevalence in South Africa? Why/ why not?</li> <li>11. In your opinion, do you think it is feasible to achieve malaria elimination in South Africa by 2018? Elaborate</li> <li>12. Who do you think should be involved in implementing malaria elimination policy (at</li> </ol> | <ol style="list-style-type: none"> <li>8. To what extent is malaria elimination agenda a priority to you? Elaborate</li> <li>9. Are you concerned about the level of malaria prevalence in your operational setting? Why/ why not?               <ol style="list-style-type: none"> <li>(a) How is it being controlled</li> <li>(b) Are cases increasing, decreasing or staying the same?</li> <li>(c) Is malaria still a problem?</li> </ol> </li> </ol> | <ol style="list-style-type: none"> <li>6. To what extent is malaria elimination agenda a priority to you? Elaborate</li> <li>7. Are you concerned about the level of malaria prevalence in South Africa? Why/ why not?               <ol style="list-style-type: none"> <li>(a) How is it being controlled</li> <li>(b) Are cases increasing, decreasing or staying the same?</li> <li>(c) Is malaria still a problem?</li> <li>(d) Since the adoption of malaria elimination policy, what has been achieved?</li> </ol> </li> </ol> |

|                                                                                            |                                                                                                                                                                                                                                                                                                                       |                                                                                                                                                                                                                                                                                                                                                                                                                                                                                                                             |                                                                                                                                                                                                                                                                                                                                                                     |
|--------------------------------------------------------------------------------------------|-----------------------------------------------------------------------------------------------------------------------------------------------------------------------------------------------------------------------------------------------------------------------------------------------------------------------|-----------------------------------------------------------------------------------------------------------------------------------------------------------------------------------------------------------------------------------------------------------------------------------------------------------------------------------------------------------------------------------------------------------------------------------------------------------------------------------------------------------------------------|---------------------------------------------------------------------------------------------------------------------------------------------------------------------------------------------------------------------------------------------------------------------------------------------------------------------------------------------------------------------|
|                                                                                            | <p>individual/ group/ or organizational level)?</p> <p>13. How familiar are you with the South African malaria elimination policy? Elaborate</p> <p>14. Do you know what process was followed in developing this policy? Elaborate</p>                                                                                | <p>(d) Since the adoption of malaria elimination policy, what has been achieved?</p> <p>10. Do you think it is feasible to achieve malaria elimination in South Africa by 2018? Elaborate</p> <p>11. Who do you think should be involved in implementing malaria elimination policy (at individual/ group/ or organizational level)?</p> <p>12. How familiar are you with the South African malaria elimination policy? Elaborate</p> <p>13. Do you know what process was followed in developing this policy? Elaborate</p> | <p>8. Who should be involved in implementing malaria elimination policy in South Africa? Elaborate</p> <p>9. What will it take to achieve elimination by 2018?</p> <p>10. Who did the process of developing the malaria elimination policy involve and why?</p>                                                                                                     |
| <p><b>Distinguishing features between malaria control and elimination</b></p>              | <p>15. Please share key similarities between malaria control strategy and malaria elimination (if any)</p> <p>16. Please share key differences between malaria control strategy and elimination (if any)</p>                                                                                                          | <p>14. Please share key similarities between malaria control strategy and malaria elimination (if any)</p> <p>15. Please share key differences between malaria control strategy and elimination (if any)</p>                                                                                                                                                                                                                                                                                                                | <p>11. What are the key distinguishing features between South Africa's malaria control policy of 2007 and the current malaria elimination policy?</p>                                                                                                                                                                                                               |
| <p><b>Barriers and facilitating factors to implementing malaria elimination policy</b></p> | <p>17. Have you observed or experienced any barriers to implementing malaria elimination policy? Elaborate</p> <p>18. Do you foresee any opportunities to enhance the current malaria elimination policy? Elaborate</p> <p>19. How feasible do you think it is to implement malaria elimination policy? Elaborate</p> | <p>16. Have you experienced any barriers to implementing malaria elimination policy? Elaborate</p> <p>17. Do you foresee any opportunities to enhance the current malaria elimination policy? Elaborate</p> <p>18. How feasible it is to implement malaria elimination policy? Elaborate</p>                                                                                                                                                                                                                                | <p>12. To date, have you experienced or observed any barriers to implementing malaria elimination policy? Elaborate</p> <p>13. Do you foresee any opportunities to enhance the current malaria elimination policy? Elaborate</p> <p>14. If you were to share with another country targeting elimination the key lessons you have learned so far with regards to</p> |

|                                 |                                                                                                                                                                                                                                                                                                                                                                                                                                                                                                      |                                                                                                                                                                                                                                                                                                                                                                                                                                                                                                   |                                                                                                                                     |
|---------------------------------|------------------------------------------------------------------------------------------------------------------------------------------------------------------------------------------------------------------------------------------------------------------------------------------------------------------------------------------------------------------------------------------------------------------------------------------------------------------------------------------------------|---------------------------------------------------------------------------------------------------------------------------------------------------------------------------------------------------------------------------------------------------------------------------------------------------------------------------------------------------------------------------------------------------------------------------------------------------------------------------------------------------|-------------------------------------------------------------------------------------------------------------------------------------|
|                                 | <p>20. How might malaria elimination policy affect your organization and your work?</p> <p>21. How easy or difficult do you think it is to manage and enforce this policy?</p> <p>22. What barriers might be faced in implementing malaria elimination policy or strategy? How could these barriers be overcome?</p>                                                                                                                                                                                 | <p>19. How does malaria elimination policy affect your Department and your work? Elaborate</p> <p>20. How easy or difficult it is to implement this policy?</p> <p>21. What are the barriers to implementing this policy or strategy? How could these barriers be overcome?</p>                                                                                                                                                                                                                   | <p>implementing malaria elimination policy, what would they be?</p>                                                                 |
| <p><b>General questions</b></p> | <p>23. If you were to be entrusted with the overall strategic responsibility to ensure that malaria elimination is achieved in South Africa:</p> <p>a. Is there anything new you would introduce? Elaborate.</p> <p>b. Is there anything you would withdraw/ cancel? Elaborate.</p> <p>c. Is there anything you would retain as is or improve on? Elaborate.</p> <p>24. Is there anything else you want to share pertaining to the implementation of malaria elimination policy in South Africa?</p> | <p>22. If you were to be entrusted with the overall strategic responsibility to ensure that malaria elimination is achieved in South Africa:</p> <p>a. Is there anything new you would introduce? Elaborate</p> <p>b. Is there anything you would withdraw/ cancel? Elaborate</p> <p>c. Is there anything you would retain as is or improve on? elaborate</p> <p>23. Is there anything else you want to share pertaining to the implementation of malaria elimination policy in South Africa?</p> | <p>15. Is there anything else you want to share pertaining to the implementation of malaria elimination policy in South Africa?</p> |

Adapted in Gase et al. 2011
